# Supplementary material for: A chromium nitride/carbon nitride containing graphitic carbon nanocapsule hybrid as a Pt-free electrocatalyst for oxygen reduction
Source: Royal Society of Chemistry journal article supplement (doi:10.1039/c5cc04482k), 2015-01-01
Supplement: c5cc04482k1.pdf [file c5cc04482k1.pdf]

## Supporting Information

### **Chromium nitride /carbon nanocapsules containing carbon nitride hybrid as Pt-free electrocatalyst for oxygen reduction**

Lu Zhao, Lei Wang,\* Peng Yu, Dongdong Zhao, Chungui Tian, He Feng, Jing Ma and Honggang Fu\*

#### **Experimental section:**

#### **1. Synthesis**

##### **1.1 Synthesis of CrN/GC hybrid**

In a typical synthesis, 10 g of polyacrylic weak-acid anion-exchanged resin (PWAR) was exchanged with 100 mL of 0.1 M  $\text{K}_3[\text{Fe}(\text{CN})_6]/\text{K}_2\text{Cr}_2\text{O}_7$  (1:1) mixture solution and stirred for 20 h, then the  $\text{PWAR-Cr}_2\text{O}_7^{2-}-[\text{Fe}(\text{CN})_6]^{3-}$  precursor was obtained. Subsequently, 2.5 g of the obtained precursor was added into 50 mL isobutanol and stirred for 0.5 h. Then the above suspension was transferred into a Teflon-lined stainless steel autoclave and kept at 180 °C for 4 h. After filtering, washing and drying, and then dried at 60 °C for 2 h in air. Afterwards, the product was nitrided under  $\text{NH}_3$  atmosphere with a heating rate of 5 K  $\text{min}^{-1}$  at 900°C for 6h. Finally, the CrN/GC-2-900 hybrid was obtained after treating with hydrochloric acid solution to remove the Fe species completely. In order to study the effect of heated temperature and CrN content on the ORR performance, the other compared samples were also synthesized (the detailed experimental parameters were displayed in Table S1). The resulting hybrids were denoted as CrN/GC-c-T, in which c stands for different concentrations of  $\text{Cr}_2\text{O}_7^{2-}$  ions in the initial ion-exchanged solution, T stands for the nitrided temperature.

##### **1.2 Synthesis of GC**

For comparison the effect of CrN on the ORR performance in the hybrid, the graphitic carbon (GC) without CrN was synthesized as the same condition of CrN/GC-2-900 only in the absence of  $\text{K}_2\text{Cr}_2\text{O}_7$  to obtain GC.

**Table S1.** The experiments parameters for all the compared samples.

| Samples name  | Pyrolyzation temperature<br>(°C) | Ion-exchanged concentration of<br>$\text{Cr}_2\text{O}_7^{2-}$ (M) | Ion-exchanged concentration of<br>$[\text{Fe}(\text{CN})_6]^{3-}$ (M) | CrN content in the samples calculated from TG(%) |
|---------------|----------------------------------|--------------------------------------------------------------------|-----------------------------------------------------------------------|--------------------------------------------------|
| CrN/GC-1-900  | 900                              | 0.03                                                               | 0.05                                                                  | 9.38                                             |
| CrN/GC-2-900  | 900                              | 0.05                                                               | 0.05                                                                  | 50.7                                             |
| CrN/GC-3-900  | 900                              | 0.06                                                               | 0.05                                                                  | 67.3                                             |
| CrN/GC-2-800  | 800                              | 0.05                                                               | 0.05                                                                  | 59.6                                             |
| CrN/GC-2-1000 | 1000                             | 0.05                                                               | 0.05                                                                  | 57.2                                             |
| GC            | 900                              | 0                                                                  | 0.05                                                                  | —                                                |

## 2. Characterizations

X-ray diffraction (XRD) analyses were performed on a Bruker D8 Advance diffractometer equipped with Cu K $\alpha$  ( $\lambda = 1.5406 \text{ \AA}$ ) radiation and a LynxEye Detector. Raman spectra were taken out with a Jobin Yvon HR 800 micro-Raman spectrometer at 457.9 nm. TG analysis was tested by using a SDT Q600 instrument with a constant flow of air (flow rate:  $100 \text{ mL min}^{-1}$ ), and the temperature was raised from room temperature to 973 K at a heat rate of  $10 \text{ K min}^{-1}$ . X-ray photoemission spectroscopy (XPS) studies were carried out on a Kratos-AXIS UL TRA DLD with Al K $\alpha$  radiation source. Transmission electron microscopy (TEM) characterization was tested on a JEM-2100 electron microscope (JEOL) with an acceleration voltage of 200 kV. The nitrogen adsorption-desorption isotherms were performed by using a Micromeritics TriStar II.

## 3. Electrochemical measurements

### 3.1 Preparation of the working electrode

Typically, a predetermined amount of the corresponding electrocatalyst was dispersed in 1.5 mL ethanol and 0.5 mL of 0.5 wt.% Nafion suspension (DuPont, USA) under sonication, a well-dispersed electrocatalyst “ink” was obtained. Then, 30  $\mu\text{L}$  of the electrocatalyst as-prepared ink was dropped onto the surface of the glassy

carbon disk of the rotating ring-disk electrode (RRDE) or ring-disk electrode (RDE) and dried before electrochemical measurement. The RRDE voltammograms were tested by a RRDE with a Pt ring (inner/outer-ring diameter: 6.25/7.92 mm) and a glassy carbon disk (diameter: 5.61 mm). The LSV curves were recorded by a RDE with a glassy carbon disk (diameter: 5 mm).

### 3.2 Electrochemical tests

The catalytic activity of the electrocatalysts for the ORR was carried out with a three-electrode system by using a Pine Instrument biopotentiostat. A RRDE with a Pt ring and a glassy carbon disk was used as the working electrode. Platinum foil (1.0 cm<sup>2</sup>) and a home-made reversible hydrogen electrode (RHE) were used as the counter electrode and the reference electrode, respectively. The ORR activities of the electrocatalysts were tested in O<sub>2</sub>-saturated 0.1 M KOH aqueous solution in the potential range of 0.1–1.1 V (vs RHE) with a scan rate of 5 mV s<sup>-1</sup>. The ring potential was held at 1.2 V versus RHE. The specific kinetic current densities ( $j_k$ ) associated with the intrinsic activity of the catalysts can be obtained by Koutecky-Levich equation (1):

$$\frac{1}{j} = \frac{1}{j_k} + \frac{1}{j_d} = \frac{1}{j_k} + \frac{1}{B \omega^{1/2}} \quad (1)$$

where  $j_k$  is the kinetic current density,  $j_d$  is the diffusion-limited current density,  $\omega$  is the angular frequency of rotation. The B parameter is defined as equation (2):

$$B = 0.62 n F C_0 D_0^{3/2} \nu^{-1/6} \quad (2)$$

where  $n$  is the overall number of electrons,  $F$  is the Faraday constant (96485 C mol<sup>-1</sup>),  $C_0$  is the concentration of molecular oxygen in the electrolyte (1.2×10<sup>-6</sup> mol cm<sup>-3</sup>),  $D_0$  is the diffusion coefficient of the molecular O<sub>2</sub> in 0.1 M KOH solution (1.9×10<sup>-5</sup> cm<sup>2</sup> s<sup>-1</sup>), and  $\nu$  is the viscosity of the electrolyte (0.01 cm<sup>2</sup> s<sup>-1</sup>).<sup>[S1]</sup> The electron transfer number ( $n$ ) were determined by the followed equation (3):

$$n = 4 \times \frac{I_d}{I_d + \frac{I_r}{N}} \quad (3)$$

where  $I_r$  is ring current,  $I_d$  is disk current, and  $N$  is current collection efficiency of the Pt ring;  $N$  was determined to be 0.37 from the reduction of K<sub>4</sub>Fe[CN]<sub>6</sub>.

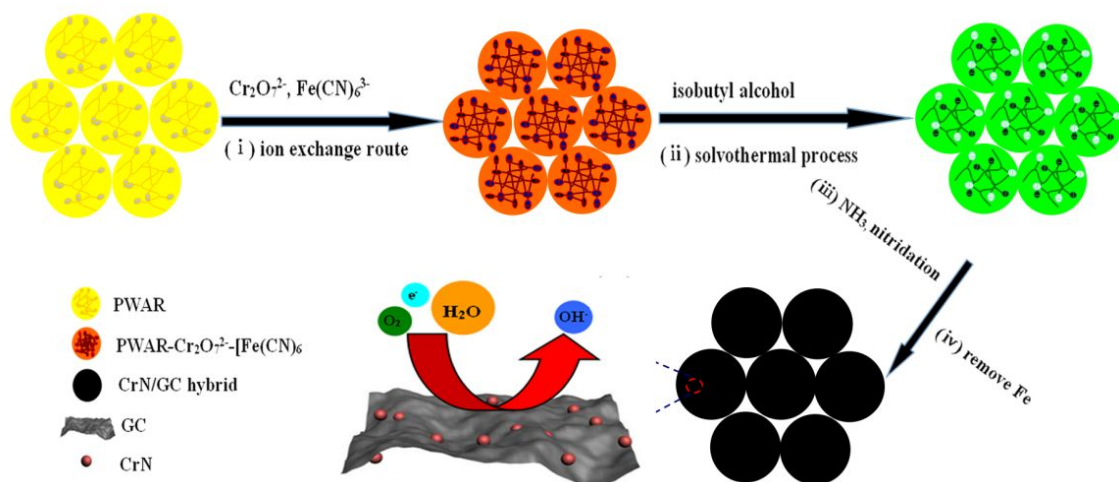

**Scheme S1.** The synthetic processes of the CrN/GC hybrid.

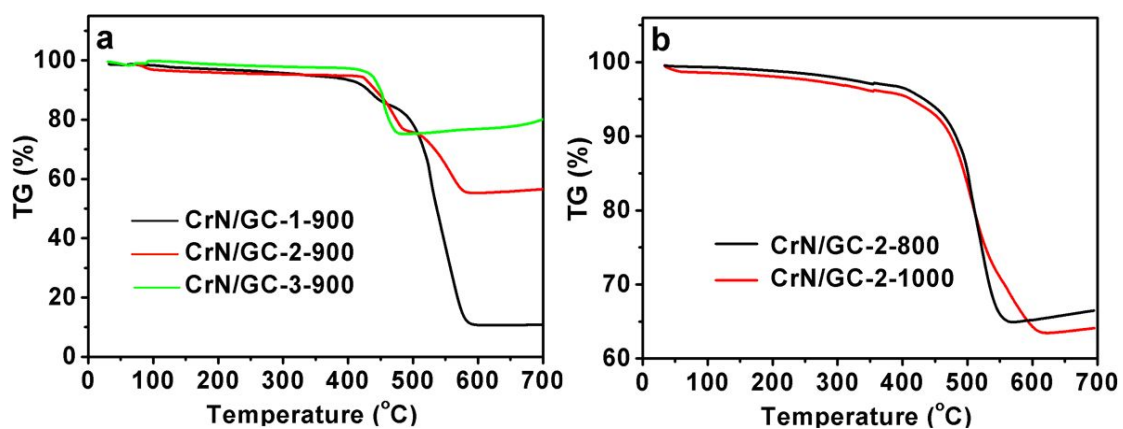

**Fig. S1** TG curves of the synthetic CrN/GC hybrids tested in air.

**Table S2.** TG analyses results derived from Fig. S1.

| Samples       | Final residual mass after              | CrN content calculated               |
|---------------|----------------------------------------|--------------------------------------|
|               | TG tests ( $\text{Cr}_2\text{O}_3\%$ ) | based on $\text{Cr}_2\text{O}_3$ (%) |
| CrN/GC-1-900  | 10.8                                   | 9.38                                 |
| CrN/GC-2-900  | 56.7                                   | 50.7                                 |
| CrN/GC-3-900  | 78.5                                   | 67.3                                 |
| CrN/GC-2-800  | 66.7                                   | 59.6                                 |
| CrN/GC-2-1000 | 64.1                                   | 57.2                                 |

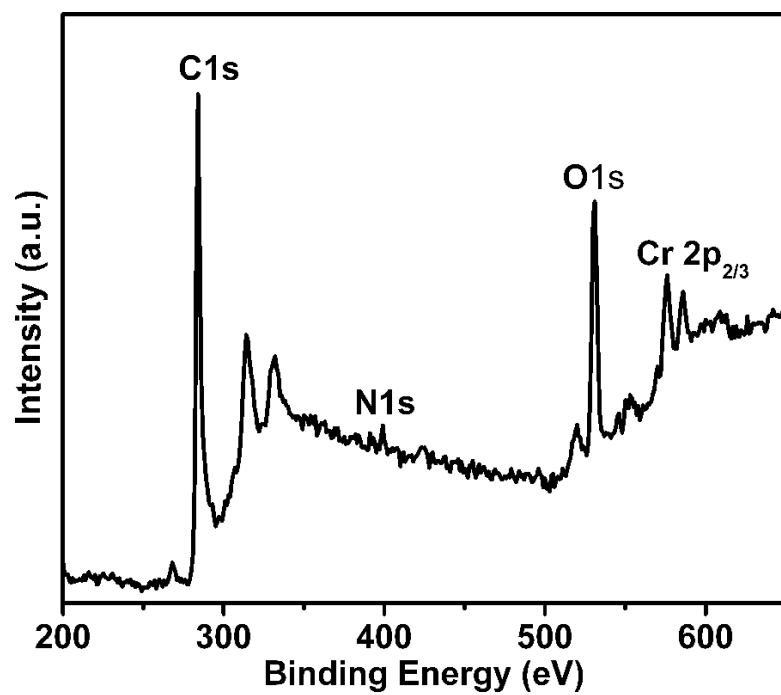

Fig. S2 Wide XPS of the synthetic CrN/GC-2-900 hybrid.

**Table S3.** Chemical compositions of the synthetic omposites.

| Samples name  | Weigh (%)             |                       |                      |                      |         | Formula of          |
|---------------|-----------------------|-----------------------|----------------------|----------------------|---------|---------------------|
|               | Cr (%) <sup>[a]</sup> | Fe (%) <sup>[a]</sup> | N (%) <sup>[b]</sup> | C (%) <sup>[b]</sup> | CrN (%) | Carbon nitrides     |
| CrN/GC-1-900  | 8.12                  | —                     | 2.67                 | 84.17                | 10.30   | CN <sub>0.005</sub> |
| CrN/GC-2-900  | 42.26                 | —                     | 12.13                | 40.28                | 53.64   | CN <sub>0.016</sub> |
| CrN/GC-3-900  | 52.58                 | —                     | 15.72                | 23.84                | 66.74   | CN <sub>0.056</sub> |
| CrN/GC-2-800  | 49.05                 | —                     | 14.86                | 35.21                | 62.26   | CN <sub>0.04</sub>  |
| CrN/GC-2-1000 | 46.89                 | —                     | 13.25                | 35.63                | 59.51   | CN <sub>0.015</sub> |
| GC            | —                     | —                     | 1.51                 | 94.76                | —       | CN <sub>0.014</sub> |

Note: <sup>[a]</sup>Determined by ICP-AES, <sup>[b]</sup> Determined by elemental analyses.

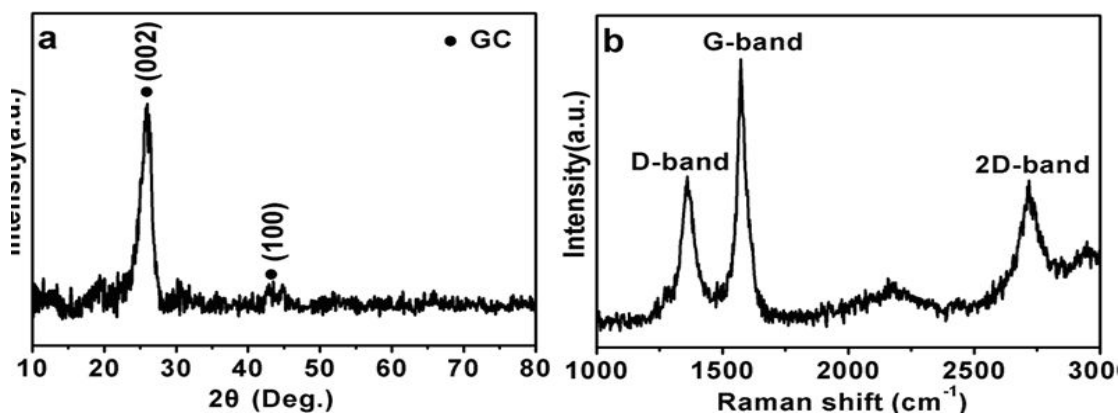

**Fig. S3** (a) XRD pattern and (b) Raman spectrum of GC.

For comparing the effect of CrN on the ORR performance, the GC sample derived from the same process as that of CrN/GC-2-900 only without  $\text{Cr}_2\text{O}_7^{2-}$  was prepared. **Fig. S3a** shows the XRD pattern of the synthetic GC, the two characteristic peaks are attributed to the (002) and (100) planes of graphitic carbon. The Raman spectrum in **Fig. S3b** exhibits the typical peak of graphitic carbon, namely the D-band ( $1355\text{ cm}^{-1}$ ), G-band ( $1571\text{ cm}^{-1}$ ) and the intense 2D-band ( $2720\text{ cm}^{-1}$ ), suggesting the high crystallinity of GC.



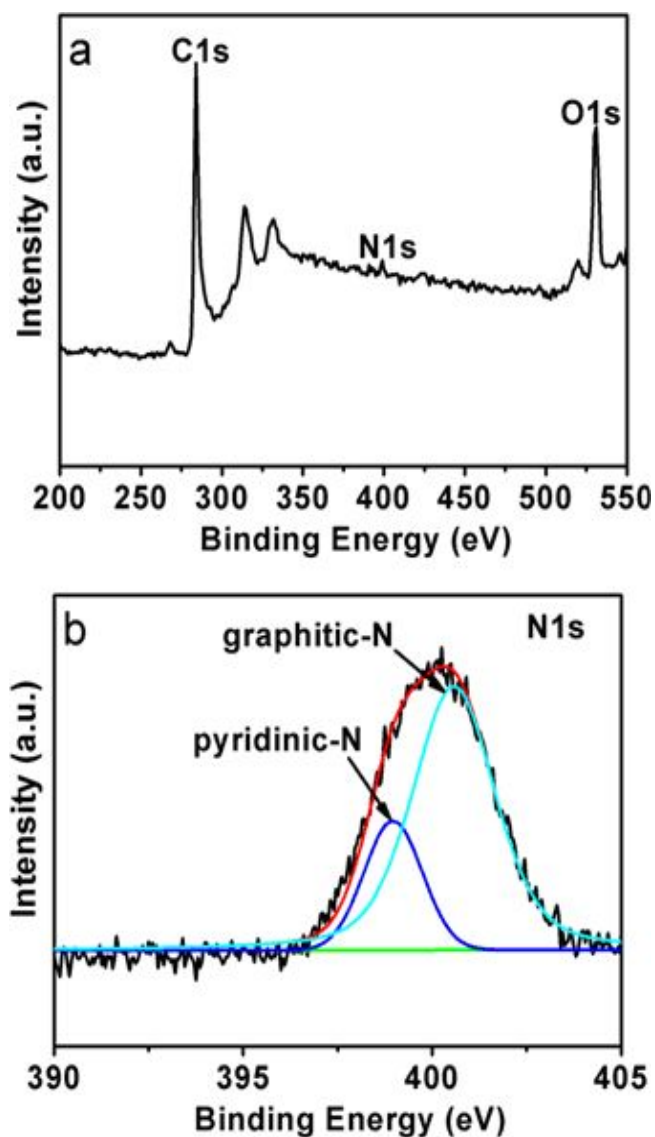

**Fig. S4** (a) Wide XPS and (b) high-resolution N1s XPS spectra of GC.

Wide XPS spectrum in **Fig. S4** shows C 1s and N 1s are found with their corresponding binding energies. The N 1s spectra can be deconvoluted into two peaks at 398.5 and 400.6 eV, which are consistent with pyridinic-N and graphitic-N (Fig. S5b), respectively,<sup>[S2, S3]</sup> implying that nitrogen was indeed doped into the carbon molecular skeletons of GC.

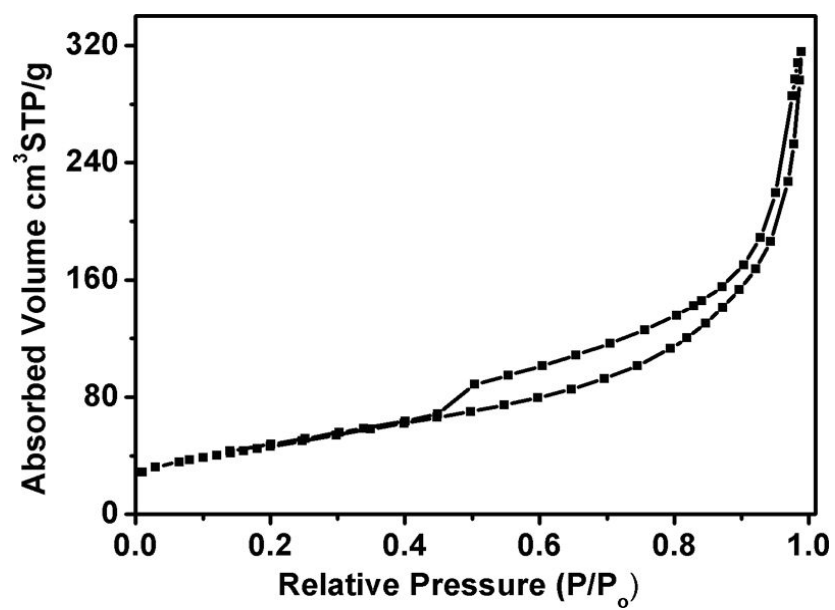

**Fig. S5** N<sub>2</sub> adsorption isotherm of the synthetic CrN/GC-2-900 hybrid.

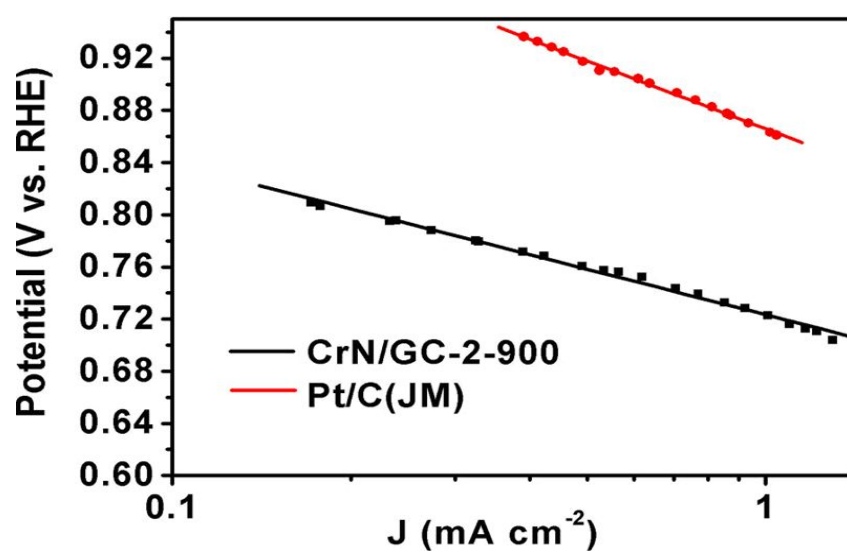

**Fig. S6** Tafel plots for CrN/GC-2-900 and Pt/C catalysts.

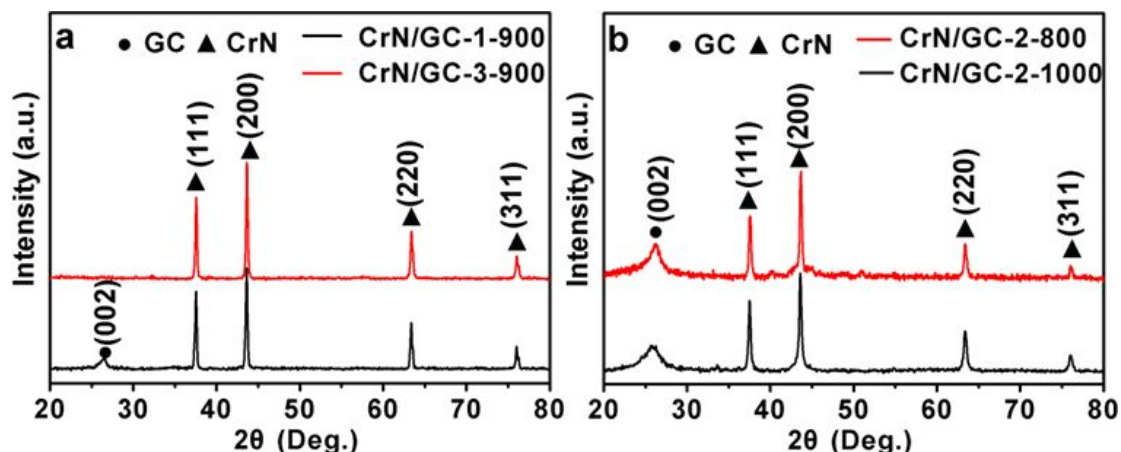

**Fig. S7** XRD patterns of the CrN/GC samples synthesized from different experimental conditions: (a) CrN/GC-1-900 and CrN/GC-3-900 derived from 0.3 and 0.06 M  $\text{Cr}_2\text{O}_7^{2-}$ , respectively; (b) CrN/GC-2-800 and CrN/GC-2-1000 with a nitrated temperature of 800 and 1000 °C, respectively.

To investigate the effect of CrN content and treatment temperature on the ORR performances, the hybrids derived from different  $\text{Cr}_2\text{O}_7^{2-}$  concentrations and different nitrated temperatures were also prepared. The CrN/GC-1-900 and CrN/GC-3-900 hybrids are derived from 0.3 and 0.06 M  $\text{Cr}_2\text{O}_7^{2-}$ , respectively, CrN/GC-2-800 and CrN/GC-2-1000 hybrids are derived from a nitrated temperature of 800 and 1000 °C. (the detailed experimental conditions were listed in **Table S1**, and corresponding CrN content tests were displayed in **Fig. S1** and **Table S2**. All the hybrids exhibit the same peaks as shown in **Fig. S7**. The diffraction peaks at 37.5°, 43.6°, 63.4°, 76.0° can be assigned to the (100), (002), (101) and (311) facets of CrN with a face-centered cubic structure, which matched well with those reported in the JCPDS 03-065-2899. The peak at  $2\theta=26.4^\circ$  is the (002) diffractions of graphitic carbon, demonstrating all the synthetic hybrids are composed of CrN and graphitic carbon with well crystalline.

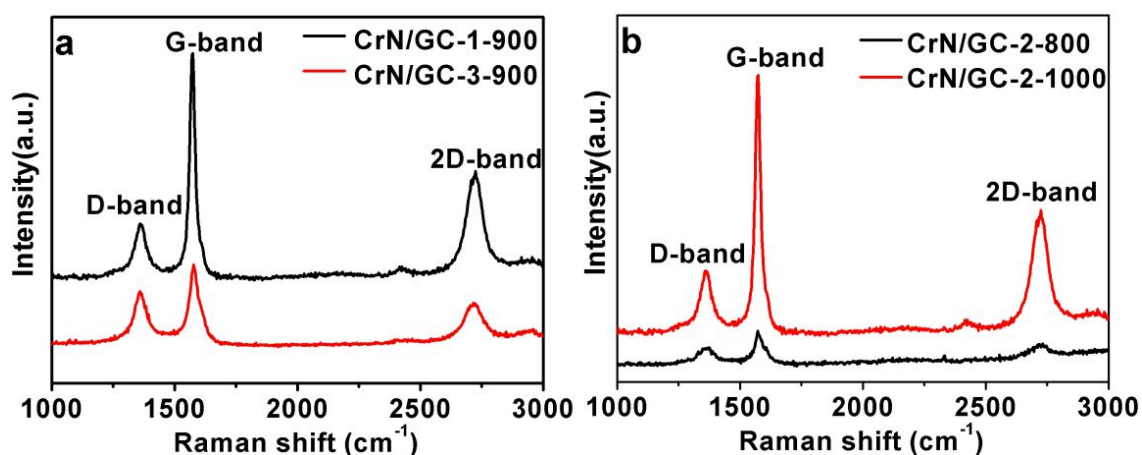

**Fig. S8** Raman spectra of the CrN/GC hybrids synthesized from different experimental conditions: (a) CrN/GC-1-900 and CrN/GC-3-900 derived from 0.3 and 0.06 M  $\text{Cr}_2\text{O}_7^{2-}$ , respectively; (b) CrN/GC-2-800 and CrN/GC-2-1000 with a nitrided temperature of 800 and 1000  $^{\circ}\text{C}$ , respectively.

Raman analysis was carried out to understand the crystal structure of the obtained carbon materials. As can be seen from Fig. S8, all the hybrids show the similar peak of D-band, G-band and 2D-band. The results imply the well crystalline of the synthetic hybrids, which is consistent with the above XRD results in Fig. S7.

**Table S4.** The domain size of carbon nitrides on the basis of the ratio between the peak areas under the D-band and G-band in Fig 1b, Fig. S3b and Fig. S8.

| Samples       | Domain Size (nm) |
|---------------|------------------|
| CrN/GC-1-900  | 0.50             |
| CrN/GC-2-900  | 0.77             |
| CrN/GC-3-900  | 0.90             |
| CrN/GC-2-800  | 0.83             |
| CrN/GC-2-1000 | 0.51             |
| GC            | 0.80             |

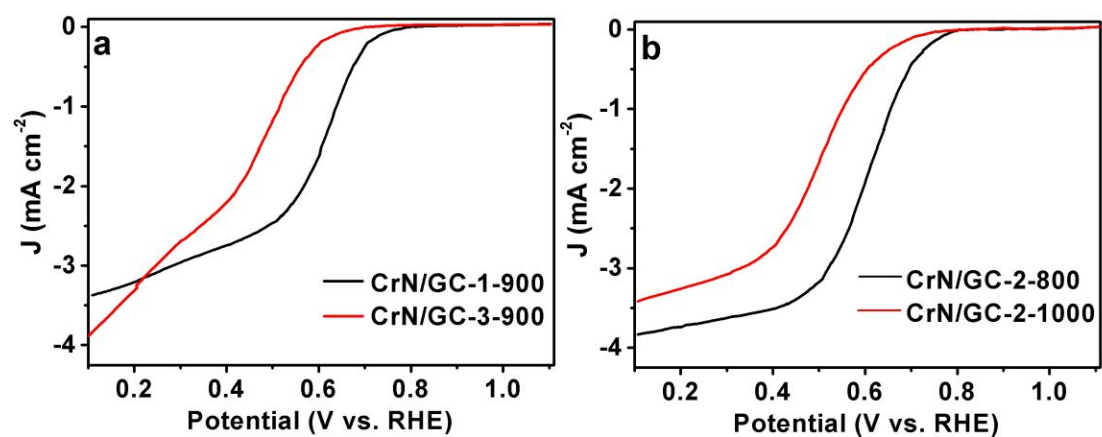

**Fig. S9.** LSV curves of the CrN/GC samples synthesized from different experimental conditions: (a) CrN/GC-1-900 and CrN/GC-3-900; (b) CrN/GC-2-800 and CrN/GC-2-1000 at a scan rate of  $5 \text{ mV s}^{-1}$  with a rotation rate 1600 rpm in  $\text{O}_2$ -saturated 0.1 M KOH electrolyte.

**Table S5.** The ORR performances of all the compared samples.

| Samples             | E <sub>onset</sub><br>(V) | E <sub>1/2</sub><br>(V) | Electrons transfer<br>number (n) | i <sub>L</sub><br>(mA cm <sup>-2</sup> ) |
|---------------------|---------------------------|-------------------------|----------------------------------|------------------------------------------|
| CrN/GC-1-900        | 0.80                      | 0.63                    | 3.87                             | 3.36                                     |
| <b>CrN/GC-2-900</b> | <b>0.86</b>               | <b>0.70</b>             | <b>4.10</b>                      | <b>3.93</b>                              |
| CrN/GC-3-900        | 0.73                      | 0.50                    | 3.52                             | 3.81                                     |
| CrN/GC-2-800        | 0.79                      | 0.62                    | 4.13                             | 3.82                                     |
| CrN/GC-2-1000       | 0.77                      | 0.52                    | 3.15                             | 3.39                                     |
| GC                  | 0.58                      | 0.45                    | 2.89                             | -                                        |
| Pt/C                | 0.98                      | 0.80                    | 3.98                             | 3.68                                     |



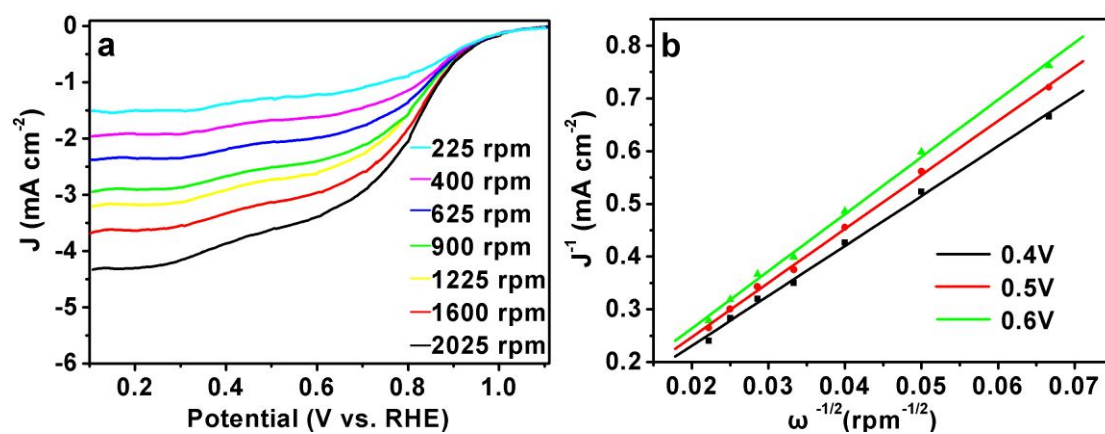

**Fig. S10** (a) LSV curves recorded for Pt/C (40 wt %, JM) electrode in an O<sub>2</sub>-saturated 0.1 M KOH solution at a scan rate of 5 mV s<sup>-1</sup> and different rotation rates; (b) Koutecky–Levich plot of  $J^{-1}$  vs.  $\omega^{-1/2}$  at different potential obtained from (a).

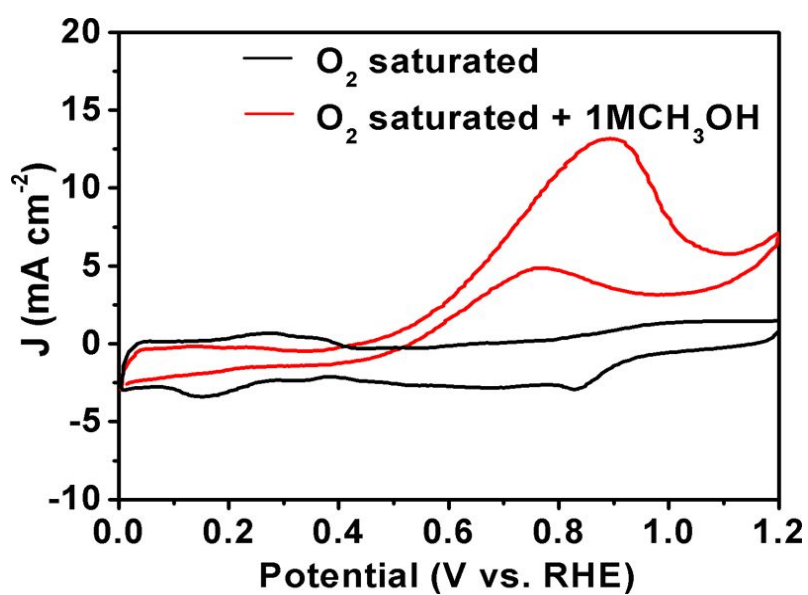

**Fig. S11** CV curves of commercial Pt/C catalyst at a scan rate of 50 mV s<sup>-1</sup> in O<sub>2</sub>-saturated 0.1 M KOH electrolyte as well as O<sub>2</sub>-saturated 0.1 M KOH with 1 M CH<sub>3</sub>OH.

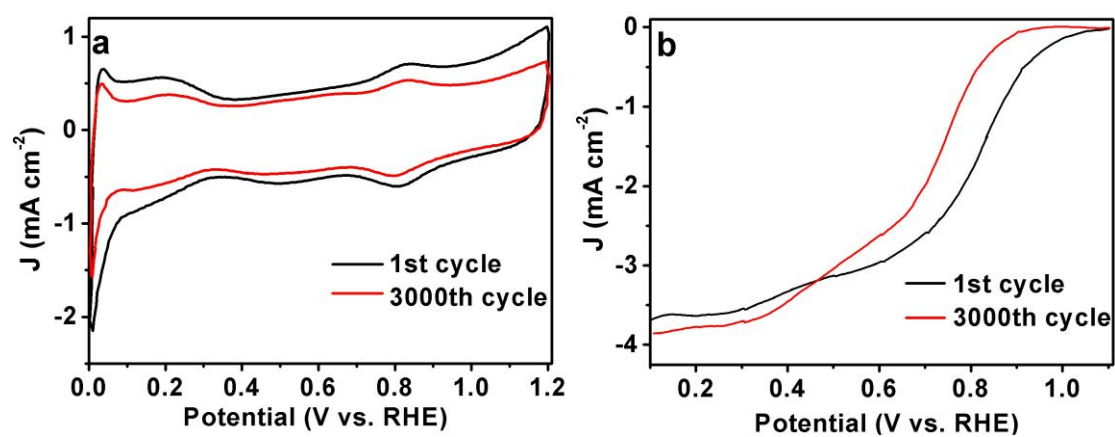

**Fig. S12** Cyclic stability test of commercial Pt/C catalyst: (a) CV curves before and after 3000 cycles at a scan rate of  $50 \text{ mV s}^{-1}$  in  $\text{N}_2$ -saturated 0.1 M KOH electrolyte; (b) LSV curves before and after 3000 cycles in  $\text{O}_2$ -saturated 0.1 M KOH electrolyte at a rotation rate of 1600 rpm with a scan rate of  $5 \text{ mV s}^{-1}$ .

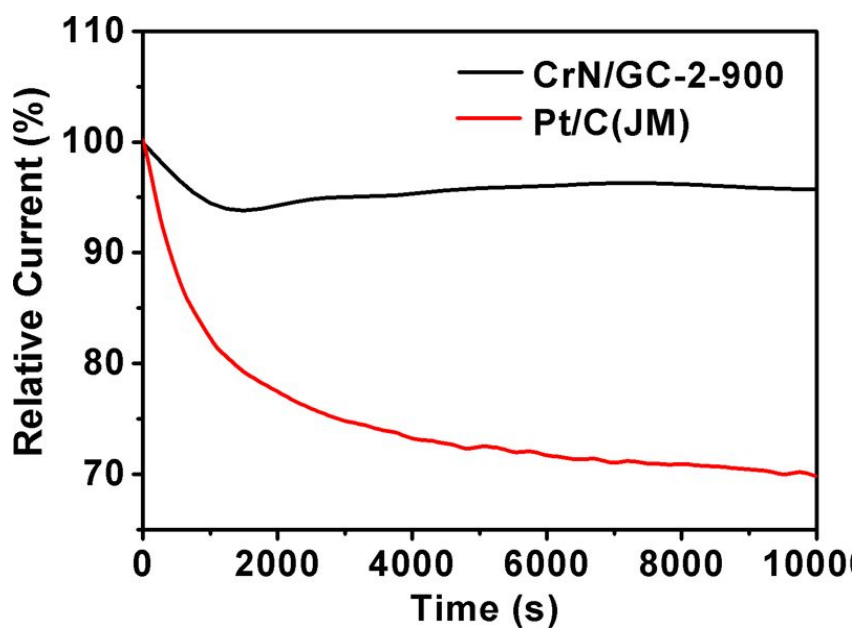

**Fig. S13** Chronoamperometric responses for the CrN/GC-2-900 and commercial Pt/C electrodes in O<sub>2</sub>-saturated 0.1M KOH electrolyte at 0.6 V (vs. RHE).

Chronoamperometric tests over 10000 s at potential 0.6 V (vs. RHE) for the catalysts were also used to estimate the durability of the catalysts, and the results are displayed in **Fig. S13**. It can be seen that the residual currents for the CrN/GC-2-900 catalyst is 95.7 % of its initial current density after 10000 s, which is much higher than that of Pt/C(JM) catalysts (70.1 % of its initial current density after 10000 s). The result demonstrated the excellent stability of the CrN/GC-2-900 catalyst compared with Pt/C(JM).

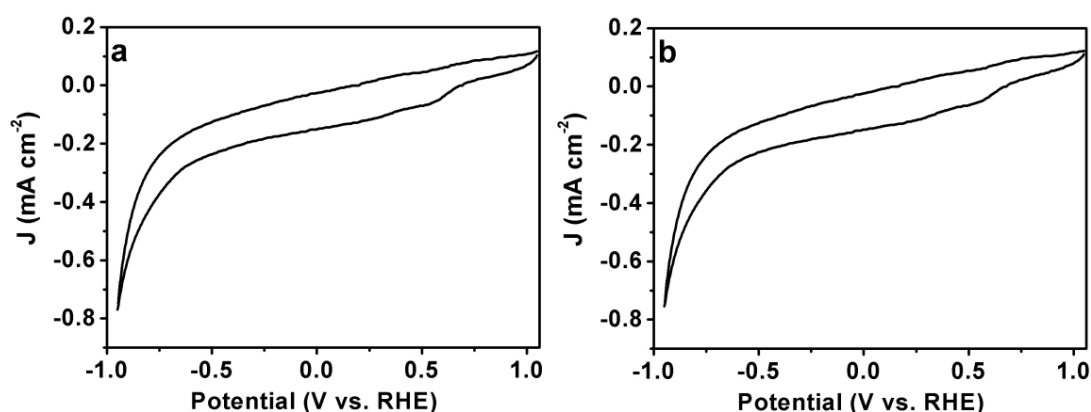

**Fig. S14** The CV curves by using the bare glassy carbon electrode in the electrolytes after stability: (a) the 0.1 M KOH electrolyte of CrN/GC-2-900 tested after 3000 cycles, namely the electrolyte after Fig. 3f test; (b) 0.1 M KOH electrolyte after 10000 s Chronoamperometric responses for the CrN/GC-2-900 at 0.6 V (vs. RHE), namely the electrolyte after Fig. S13 test.

Notably, the Cr element in CrN is very stability under the present electrochemical test. To clarify this, we test the electrolyte after stability tests (Fig. 3f and Fig. S13) by using a bare glassy carbon electrode. As shown in **Fig. S14**, there is no obvious oxidation/reduction about  $\text{Cr}^{2+}/\text{Cr}^{3+}$  around -0.41 V. We also used ICP-AES to detect the electrolyte after Fig. 3f and Fig. S13 tests, the results show no Cr species could be tested. The above analyses further demonstrate the Cr in the CrN in indeed stability. Therefore, our present study indicates the CrN/GC hybrid could be used as a promising candidate for replacing Pt.

## References:

- [S1]. Y. Jiao, Y. Zheng, M. Jaroniec and S. Z. Qiao, *J. Am. Chem. Soc.*, 2014, **136**, 4394.
- [S2]. W. Ding, L. Li, K. Xiong, Y. Wang, W. Li, Y. Nie, S. Chen, X. Qi and Z. Wei, *J. Am. Chem. Soc.*, 2015, **137**, 5414.
- [S3]. J. Yin, L. Wang, C. Tian, T. Tan, G. Mu, L. Zhao and H. Fu, *Chem. Eur. J.*, 2013, **19**, 13979.
